# Supplementary material for: Angiopoietin-2 Promotes Inflammatory Activation in Monocytes of Systemic Sclerosis Patients
Source: MDPI journal article supplement (doi:10.3390/ijms21249544), 2020-12-15
Supplement: s1 [file s1]

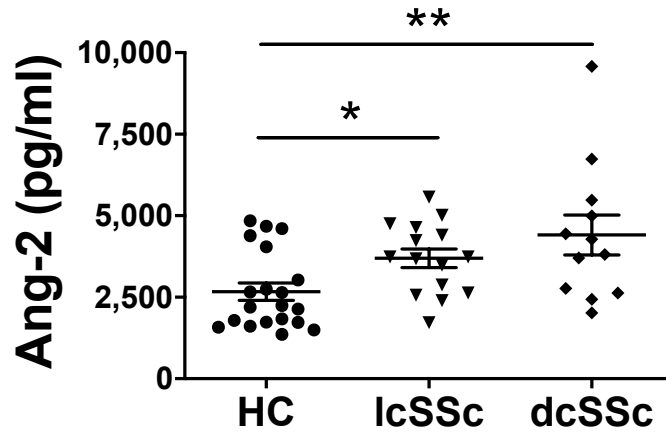

**Supplementary Figure S1. Ang-2 levels are elevated in both SSc subsets.** Ang-2 levels in serum from HC (n = 20), lcSSc (n = 15) and dcSSc patients (n=12). Mean and SEM are shown. \*  $p < 0.05$  and \*\*  $p < 0.01$ .

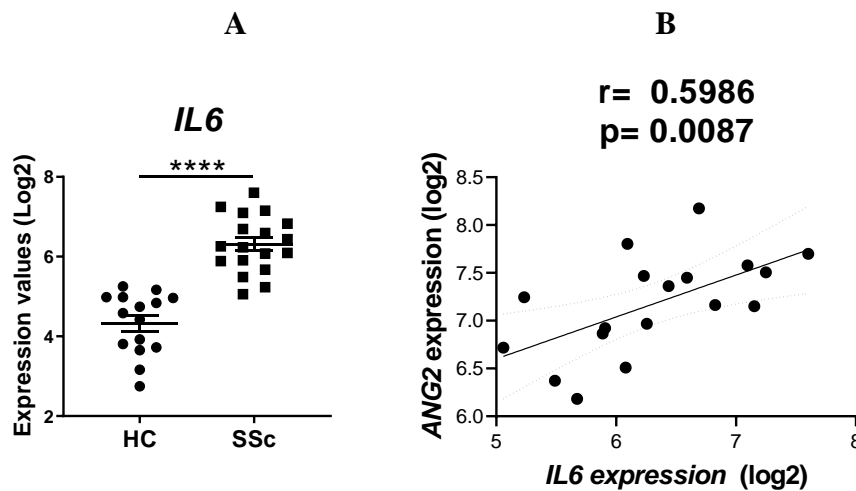

**Supplementary Figure S2. IL-6 expression is elevated in the skin of SSc patients and positively correlates with Ang-2 levels.** (A) *IL6* expression in the skin of HC (n = 15) and affected skin of SSc patients (n = 18). (B) Correlation analysis of *ANG2* and *IL6* expression in the affected skin of SSc patients. \*\*\*\*  $p < 0.0001$ .
